# Supplementary material for: Enhancing the electrochemical properties of a lithium–sulfur battery using a modified separator with a phase-inversion layer
Source: Royal Society of Chemistry journal article supplement (doi:10.1039/d3dt04128j), 2024-01-01
Supplement: d3dt04128j1.pdf [file d3dt04128j1.pdf]

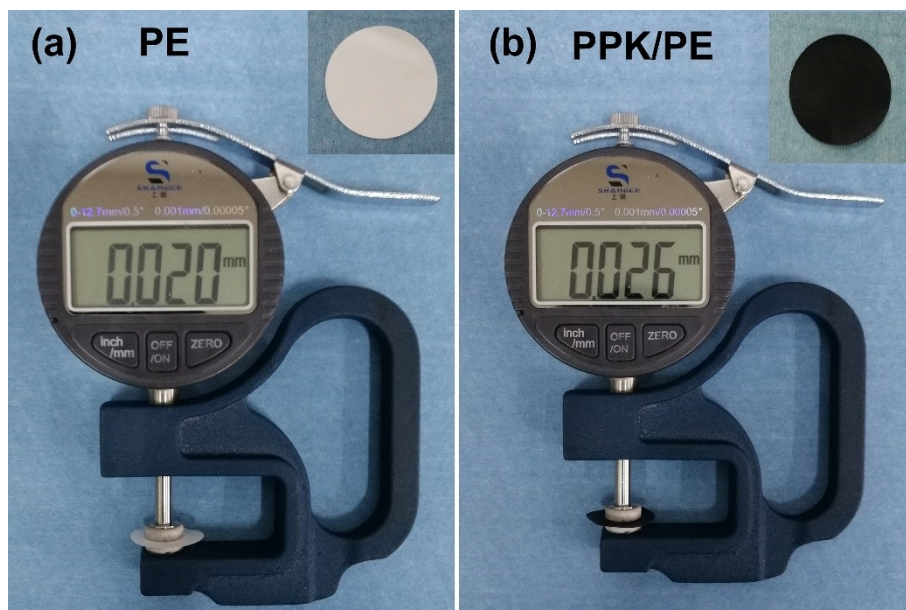

**Figure S1** The thicknesses of PE and PPK separator measured by dial thickness gauge

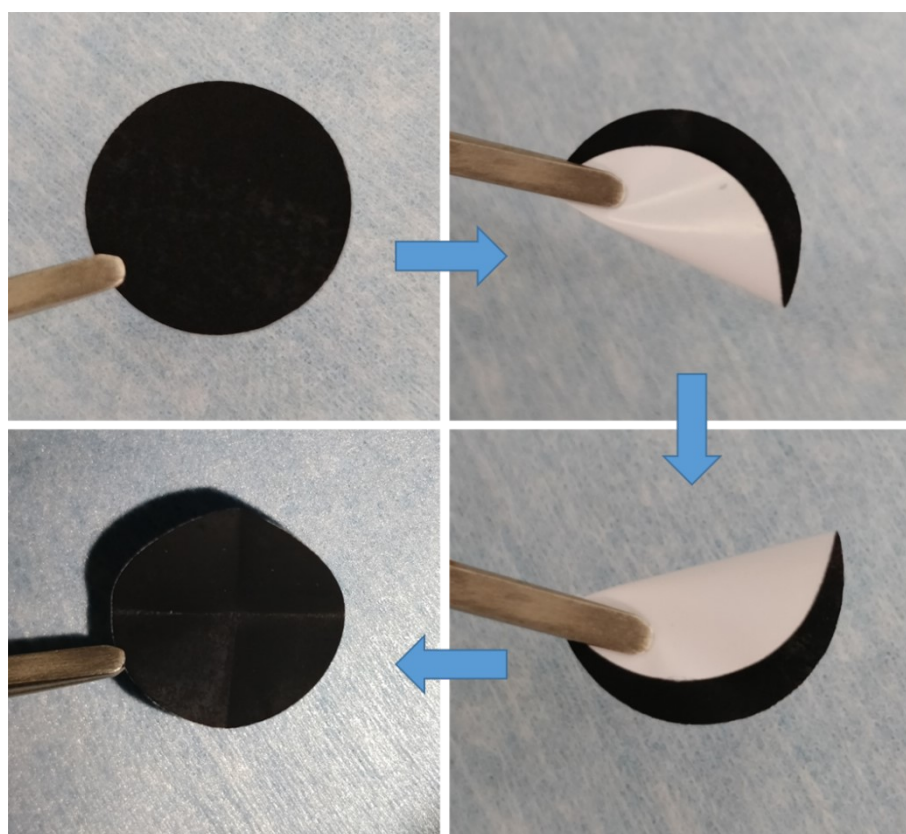

**Figure S2** The bending strength test for PPK separator

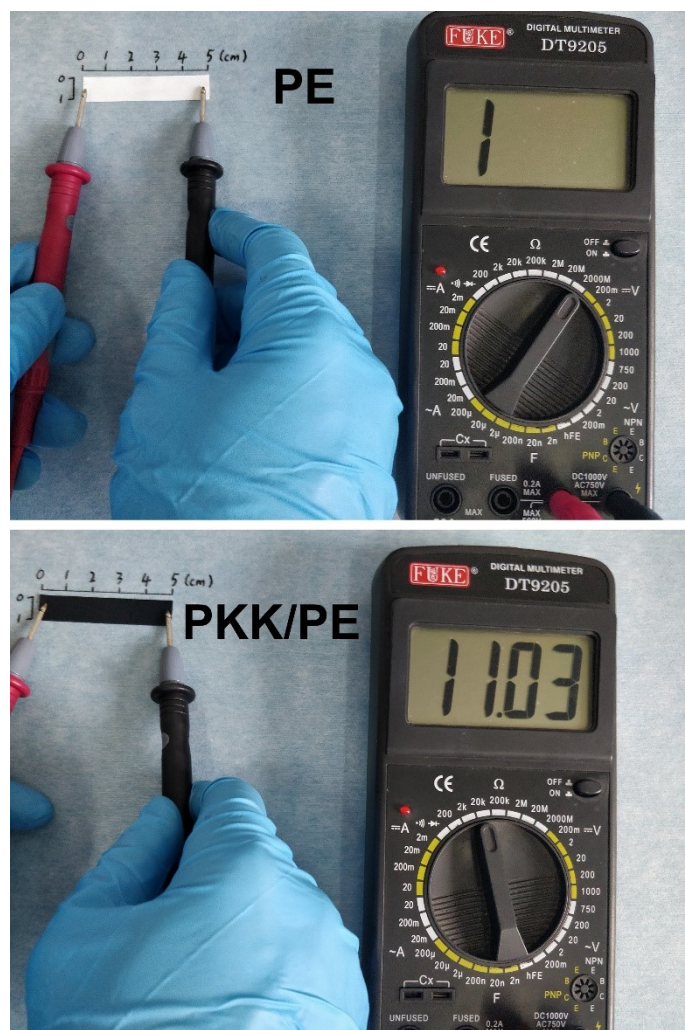

**Figure S3** The measurements of ohmic resistances for PE and PPK separator by using the digital multimeter

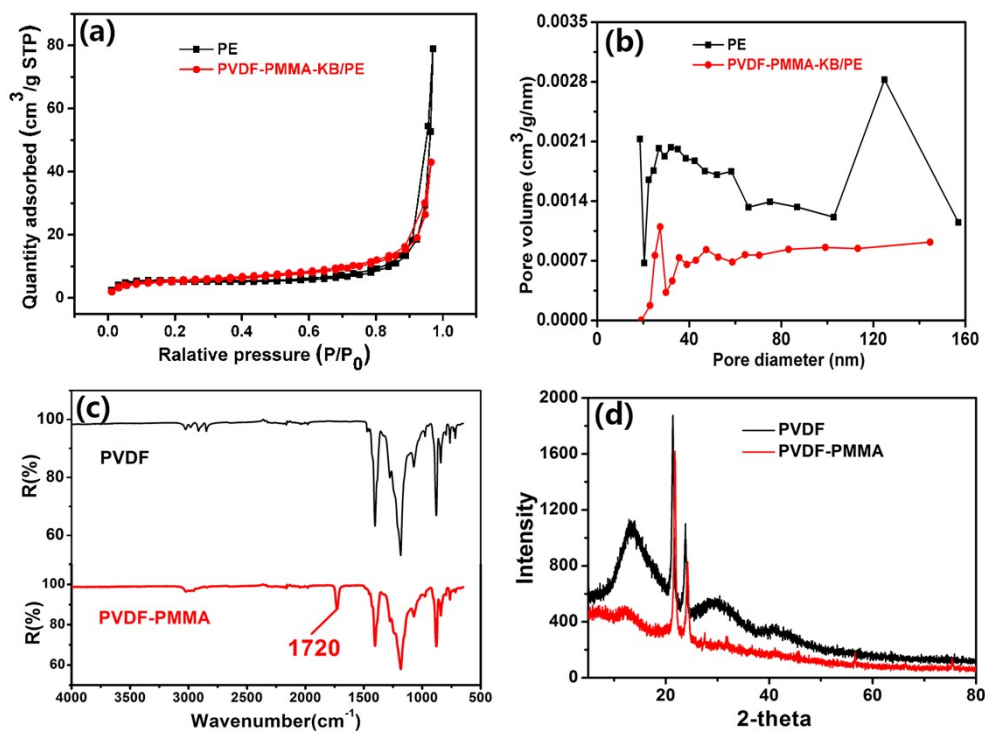

**Figure S4** (a) Nitrogen adsorption-desorption and (b) pore size distribution curves of PE and PPK modified separator, (c) FTIR spectra and (d) XRD patterns of PVDF and PVDF-PMMA

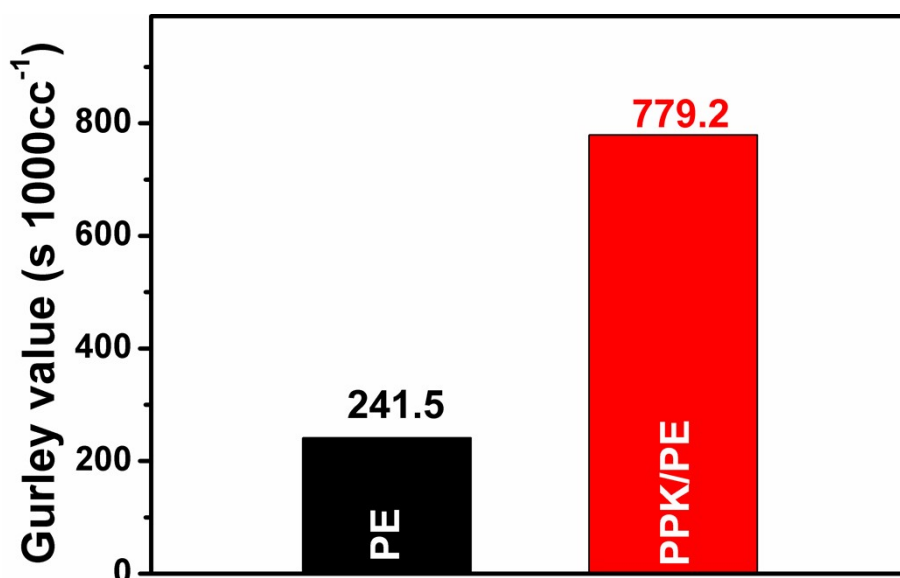

**Figure S5** Gurley values of PE and PPK separator

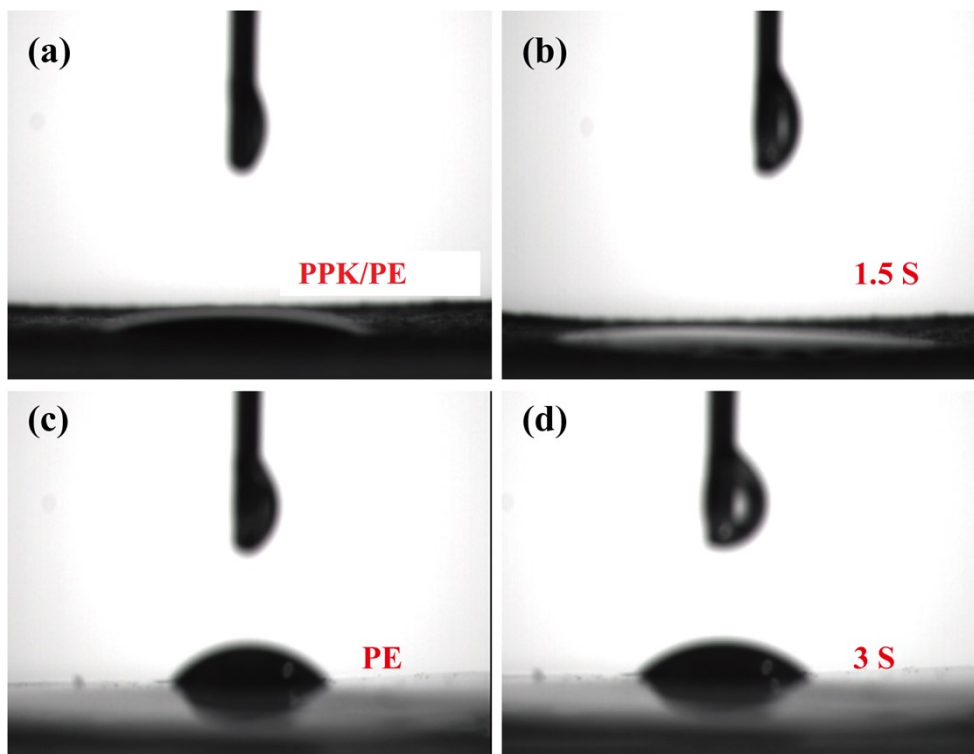

Figure S6 contact angle test of PE and PPK/PE separator.

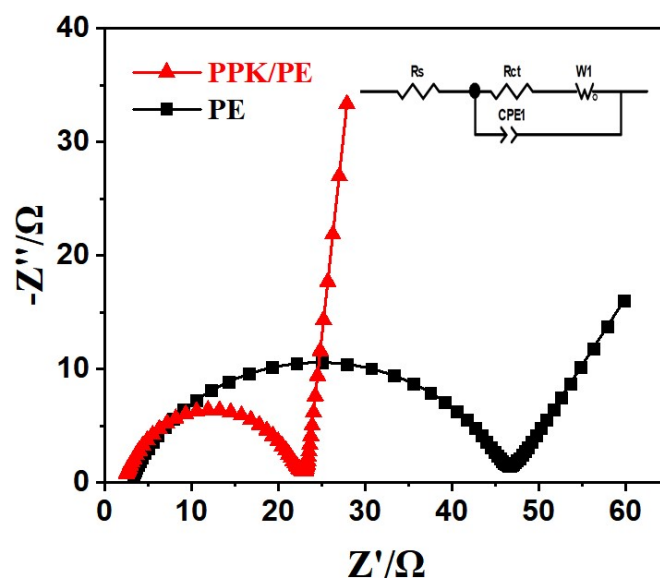

Figure S7 EIS curves of PPK/PE and PE separator after 100 cycles.

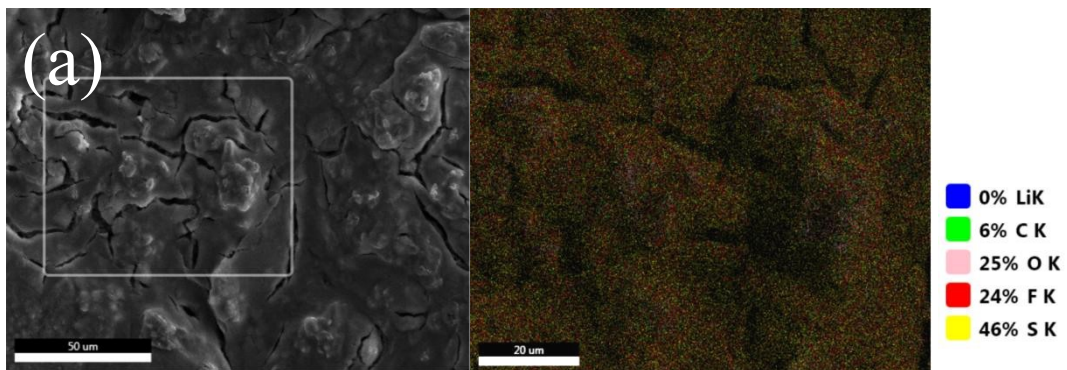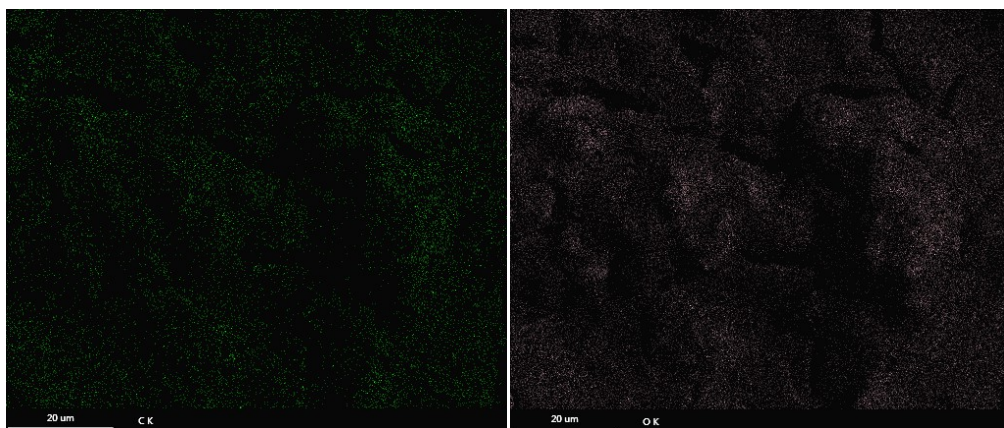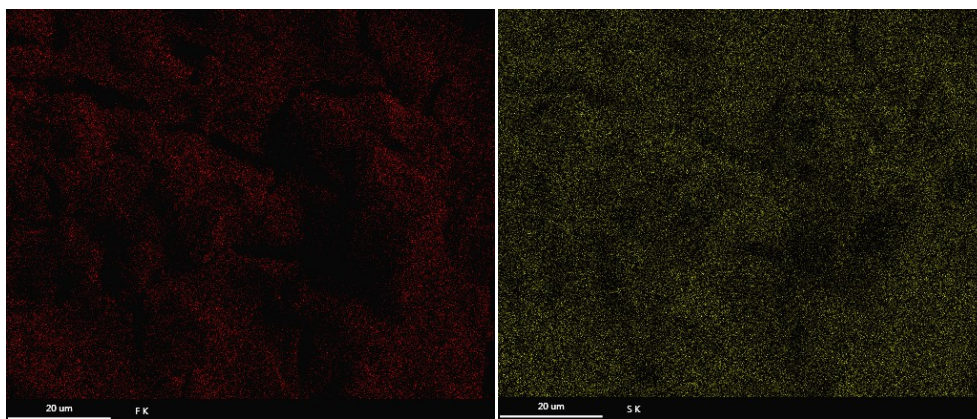

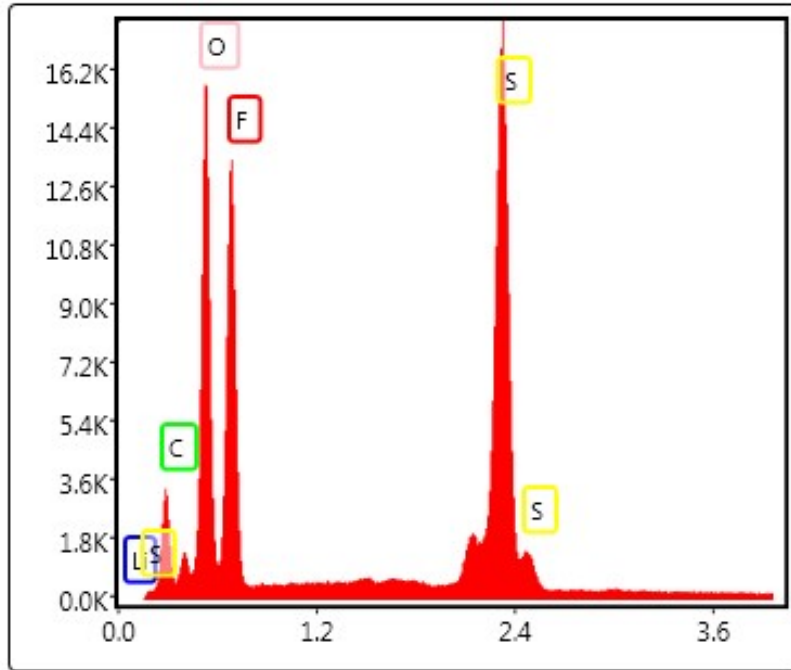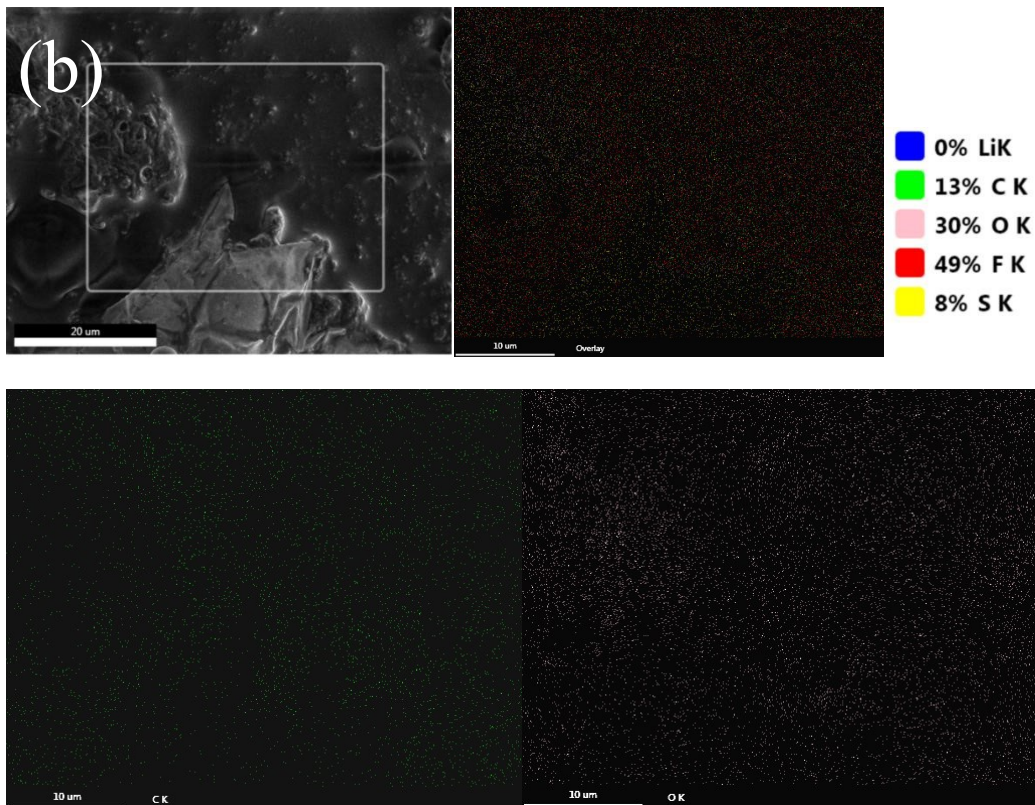

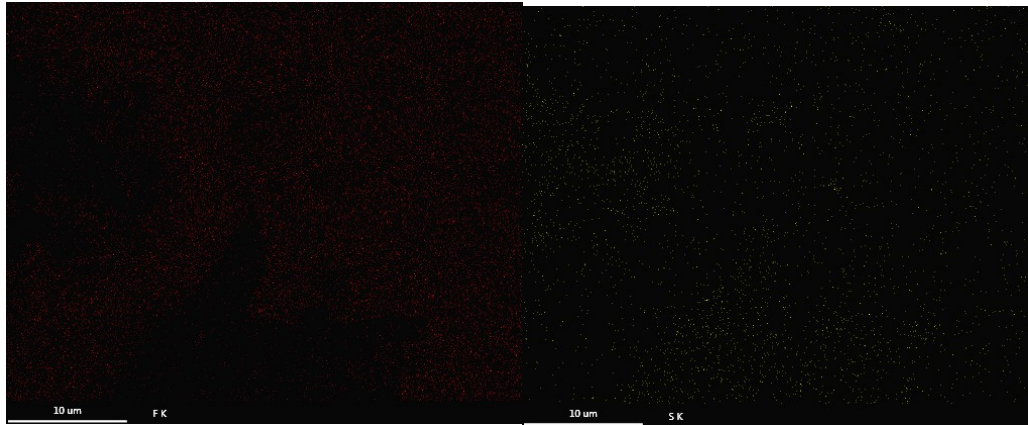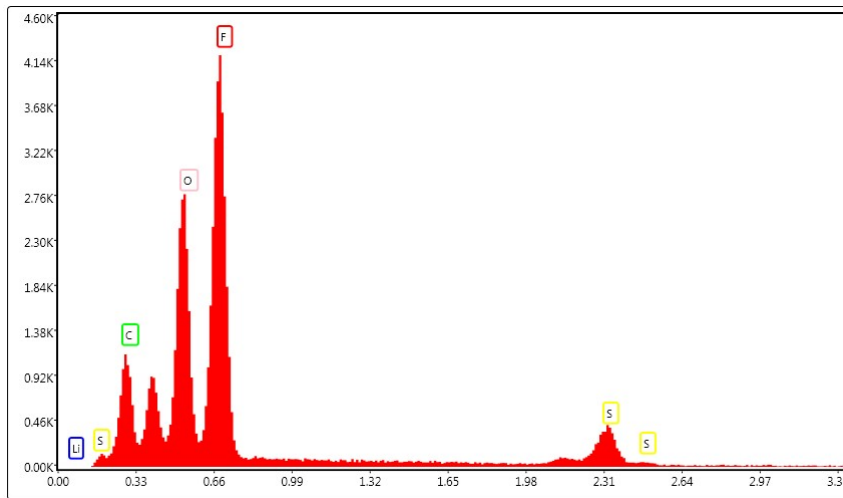

**Figure S8** SEM and EDS analysis of Li anode of (a) PE and (b) PPK/PE separator samples after cycle.

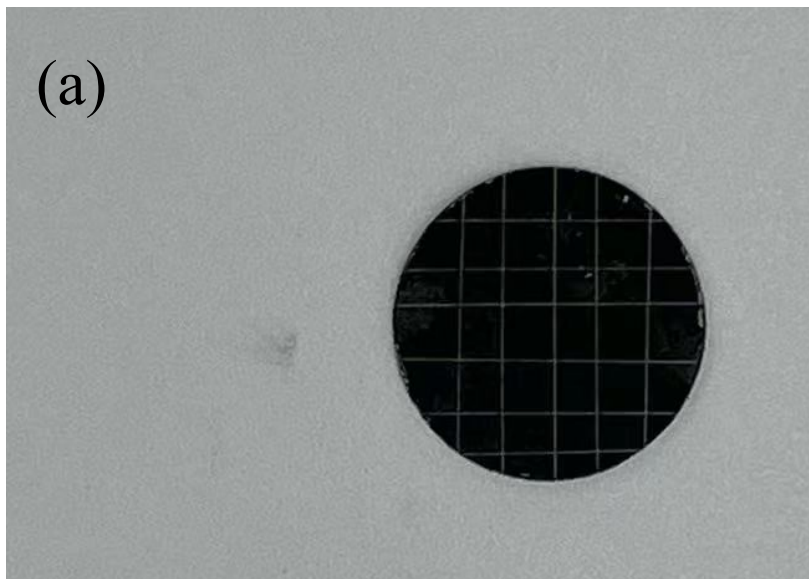

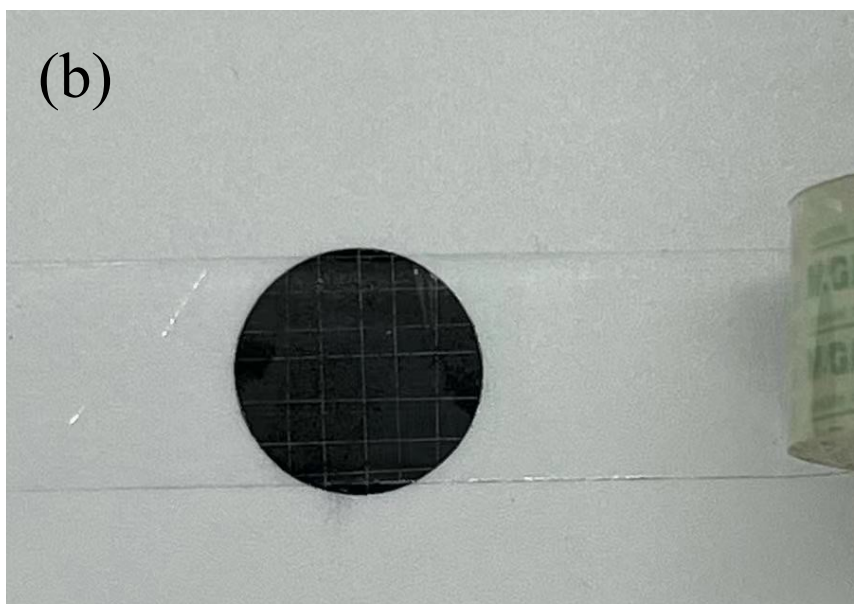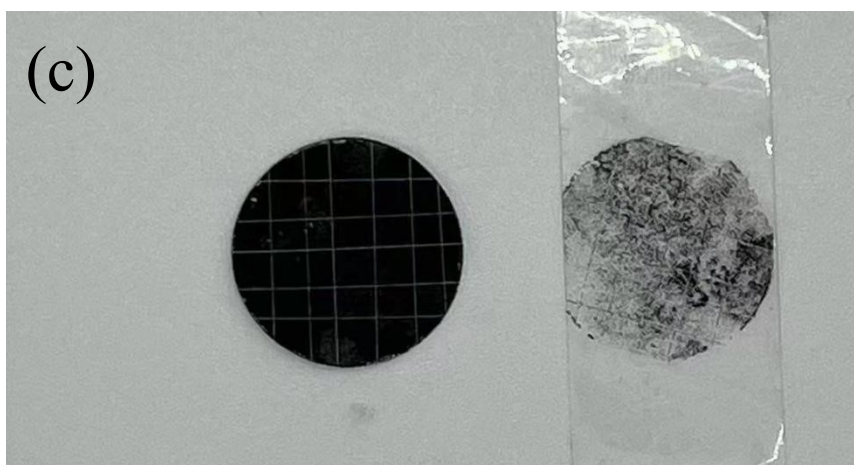

Figure S9. (a) coated separator adhered on a board, (b) scotch tape was stick on the surface of the coated layer, (c) the surface picture of the coated layer after the scotch tape was peeled of.
